# Supplementary material for: Co-immobilization of a bi-enzymatic cascade into hierarchically porous MIL-53 for efficient 6′-sialyllactose production
Source: Royal Society of Chemistry journal article supplement (doi:10.1039/d4nr01775g), 2024-01-01
Supplement: d4nr01775g1.pdf [file d4nr01775g1.pdf]

# Co-immobilization of bi-enzymatic cascade into hierarchically porous MIL-53 for efficient 6'-sialyllactose production

*Xinlv Peng<sup>a,b,c</sup>, Caixia Pei<sup>a,b,d</sup>, Eika W. Qian<sup>d</sup>, Jianjun Li<sup>a,b</sup>, Yuguang Du<sup>a,b,\*</sup>*

<sup>a</sup> State Key Laboratory of Biochemical Engineering, Institute of Process Engineering,  
Chinese Academy of Sciences, Beijing 100190, China

<sup>b</sup> Key Laboratory of Biopharmaceutical Preparation and Delivery, Chinese Academy  
of Sciences, Beijing 100190, China

<sup>c</sup> School of Chemical engineering, University of Chinese Academy of Sciences,  
Beijing 100049, China

<sup>d</sup> Graduate School of Bio-Applications and Systems Engineering, Tokyo University of  
Agriculture and Technology, Nakacho 2-24-16, Koganei, Tokyo 184-8588, Japan

## **Materials and methods**

### **Materials**

Zirconium chloride ( $ZrCl_4$ ), biphenyl-4,4-dicarboxylic acid (BPDC) and cresol red were purchased by Aladdin (Shanghai, China). CMP-Neu5Ac was purchased by Glycogene (Wuhan, China).

### **Synthesis of HP-UiO-67**

HP-UiO-67 was synthesized according to the previous literature with some modifications<sup>1</sup>. Typically, 160 mg  $ZrCl_4$  and 4.8 g dodecanoic acid were first dissolved in 40 ml DMF, then 82 mg BPDC was added. The solution was sealed in a 100 ml Teflon-lined stainless-steel vessel under autogenous pressure for 2 d at 120 °C. After the reaction, the precipitate was isolated by centrifugation and washed with 20 ml DMF for 3 times. To activate the sample, the powder was added to the mixture solution of 80 ml DMF and 0.4 ml hydrochloric acid for 12 hr at 90 °C. Finally, the powder was centrifuged and washed with 20 ml DMF for 3 times and 20 ml methanol for 3 times, and dried in a vacuum oven at 120 °C overnight.

### **Preparation of NmCSS&Pd26ST@HP-UiO-67**

Typically, for the preparation of NmCSS&Pd26ST@HP-UiO-67, 0.16 mg NmCSS (6 nmol), 0.98 mg Pd26ST (18 nmol) and 10 mg HP-UiO-67 were stirred at 4 °C for 2 hr. Afterwards, NmCSS&Pd26ST@HP-UiO-67 was obtained by centrifugation and washed 3 times with ddH<sub>2</sub>O.

### **Kinetic parameters assays**

The kinetic parameters of NmCSS were measured according to pervious research with some modifications<sup>2</sup>. For CTP, experiments were carried out in 3 mM Tris-HCl buffer (pH = 8.5) containing 0.1  $\mu$ M NmCSS, 0.13 mM cresol red, 5 mM Neu5Ac and 10 mM  $MgCl_2$  at 37 °C. CTP concentration was varied from 0.005 mM to 0.15 mM. For Neu5Ac, experiments were carried out in 3 mM Tris-HCl buffer (pH = 8.5) containing 0.1  $\mu$ M NmCSS, 0.13 mM cresol red, 5 mM CTP and 10 mM  $MgCl_2$  at 37 °C. Neu5Ac concentration was varied from 0.1 mM to 2.5 mM.

The kinetic parameters of Pd26ST were measured according to pervious research with some modifications<sup>3</sup>. For CMP-Neu5Ac, experiments were carried out in 5 mM Tris-HCl buffer (pH = 8.5) containing 0.2  $\mu$ M Pd26ST, 0.26 mM cresol red and 20 mM

lactose at 37 °C. CMP-Neu5Ac concentration was varied from 0.5 mM to 5 mM. For lactose, experiments were carried out in 5 mM Tris-HCl buffer (pH = 8.5) containing 0.2  $\mu$ M Pd26ST, 0.26 mM cresol red and 10 mM CMP-Neu5Ac at 37 °C. Lactose concentration was varied from 1 mM to 20 mM.

For immobilized enzyme, free enzyme was replaced with enzyme-MOF containing the same amount of enzyme. The absorbance change was measured at a wavelength of 574 nm. The colorimetric assays were carried out using a microplate reader (Tecan, Infinite M200 pro). The data were collected every 10 s for 5 minutes. The kinetic parameters were obtained by nonlinear regression analysis of the Michaelis–Menten equation using Origin 2018.

## Supplementary Figures

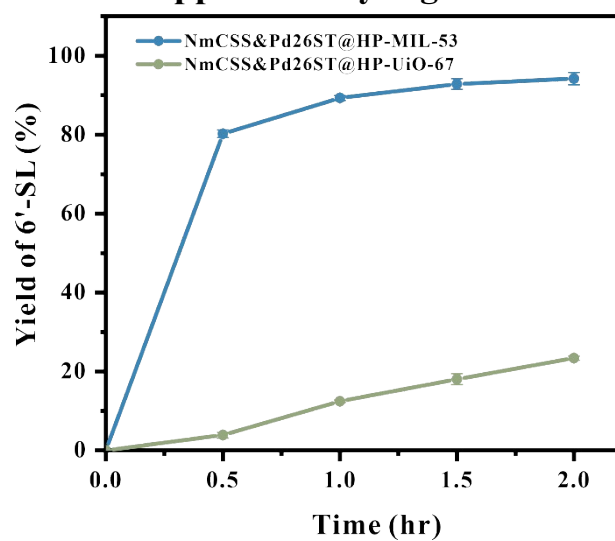

**Fig. S1** Comparison of catalytic performance of NmCSS&Pd26ST@HP-MIL-53 and NmCSS&Pd26ST@HP-UiO-67.

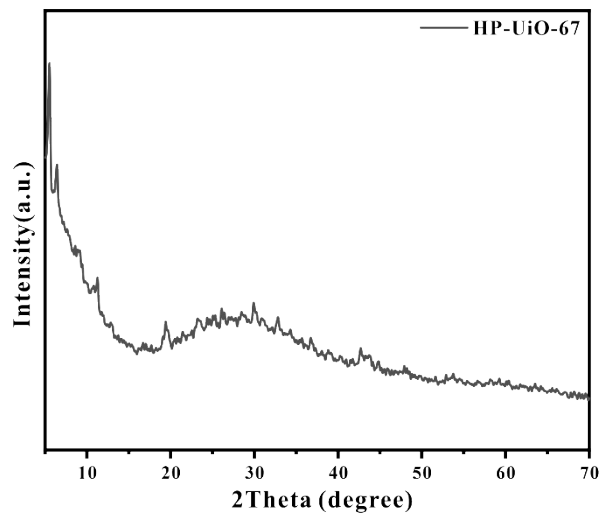

**Fig. S2** XRD spectrum of HP-UiO-67

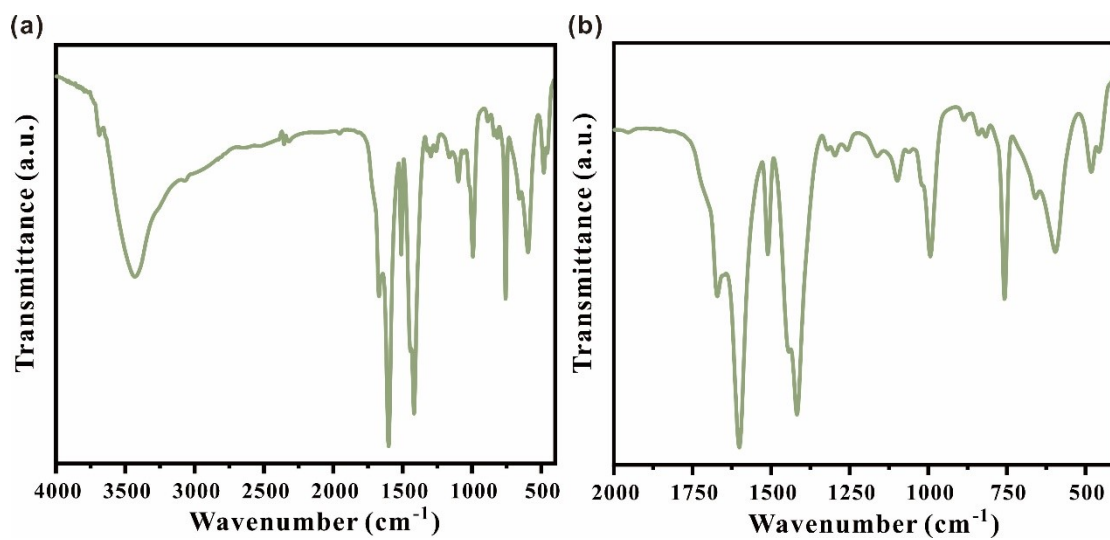

**Fig. S3** FTIR spectra of HP-MIL-53 in different wavenumber ranges.

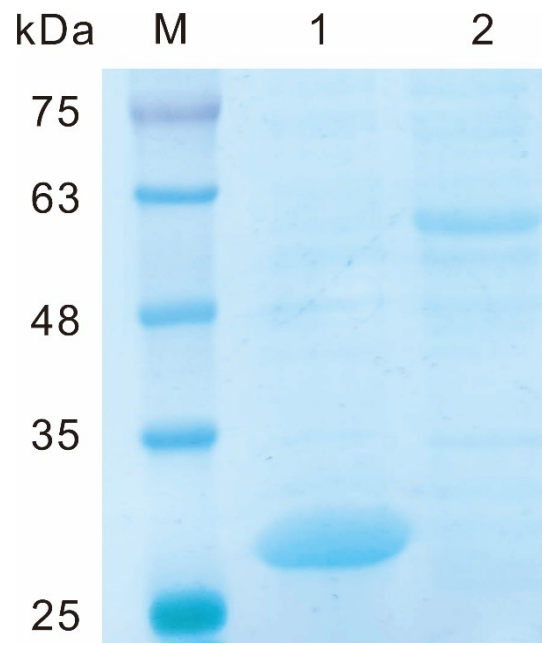

**Fig. S4** SDS-PAGE analysis of purified proteins. Lanes: M, molecular weight marker; 1, NmCSS; 2, Pd26ST.

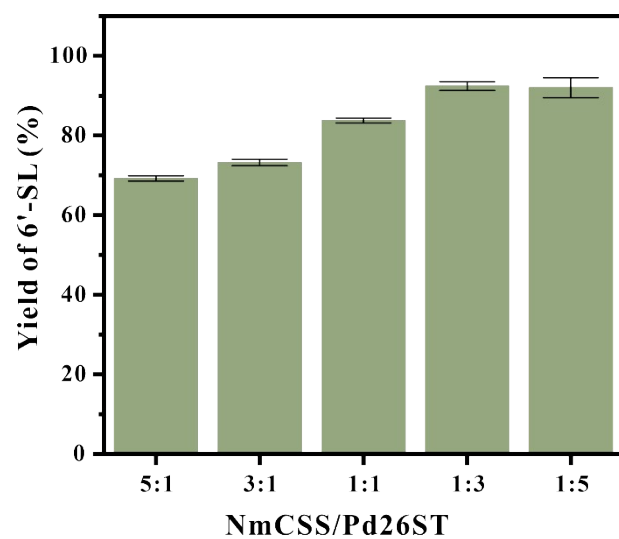

**Fig. S5** Comparison of catalytic performance of free NmCSS and Pd26ST with different molar ratio of NmCSS to Pd26ST



## Supplementary Table

**Table S1** Comparison of enzyme immobilization capacities of different MOFs

| MOFs                                   | Enzyme                    | Capacity for enzyme (mg·g <sup>-1</sup> ) | Ref.      |
|----------------------------------------|---------------------------|-------------------------------------------|-----------|
| HP-PCN-224(Fe)                         | glucose oxidase           | 192.6                                     | 4         |
| ZIF-67                                 | lipase                    | 26.9                                      | 5         |
| ZIF-90                                 | lipase                    | 132.0                                     | 6         |
| ZIF-8                                  | cellulase                 | 176.2                                     | 7         |
| Zn-MOF                                 | peroxidase                | 109.9                                     | 8         |
| Fe-BTC                                 | laccase                   | 45.2                                      | 9         |
| UiO-66-NH <sub>2</sub>                 | soybean epoxide hydrolase | 87.3                                      | 10        |
| Fe <sub>3</sub> O <sub>4</sub> @Cu-BTC | xylanase                  | 80.7                                      | 11        |
| HP-MIL-53                              | NmCSS and Pd26ST          | 226                                       | this work |

**Table S2** Pore characteristics of HP-MIL-53 prepared with different amounts of dodecanoic acid

| MOF           | $S_{\text{BET}}$ ( $\text{m}^2 \cdot \text{g}^{-1}$ ) | $V_{\text{total}}$ ( $\text{cm}^3 \cdot \text{g}^{-1}$ ) | Average pore diameter (nm) |
|---------------|-------------------------------------------------------|----------------------------------------------------------|----------------------------|
| HP-MIL-53(10) | 822.46                                                | 0.91                                                     | 4.42                       |
| HP-MIL-53(20) | 737.87                                                | 1.14                                                     | 6.18                       |
| HP-MIL-53(30) | 933.11                                                | 0.95                                                     | 4.06                       |

**Table S3** Michaelis–Menten kinetic parameters of free and immobilized NmCSS and Pd26ST

| Enzyme               | Substrate  | $K_m$ (mM)  | $k_{cat}$ (s <sup>-1</sup> ) | $k_{cat}/K_m$ (mM <sup>-1</sup> · s <sup>-1</sup> ) |
|----------------------|------------|-------------|------------------------------|-----------------------------------------------------|
| NmCSS                | CTP        | 0.014±0.002 | 5.26±0.17                    | 375.71                                              |
|                      | Neu5Ac     | 0.43±0.07   | 5.61±0.17                    | 13.05                                               |
| NmCSS@HP-MIL-53(20)  | CTP        | 0.010±0.001 | 4.61±0.06                    | 442.78                                              |
|                      | Neu5Ac     | 0.40±0.03   | 4.94±0.10                    | 12.35                                               |
| Pd26ST               | Lactose    | 6.32±1.66   | 7.60±0.63                    | 1.20                                                |
|                      | CMP-Neu5Ac | 2.23±0.24   | 9.85±0.49                    | 4.42                                                |
| Pd26ST@HP-MIL-53(20) | Lactose    | 5.84±0.40   | 6.65±0.17                    | 1.13                                                |
|                      | CMP-Neu5Ac | 1.90±0.19   | 8.40±0.43                    | 4.42                                                |

## Reference:

1. G. R. Cai and H. L. Jiang, *Angewandte Chemie-International Edition*, 2017, **56**, 563-567.
2. N. He, D. Yi and W. D. Fessner, *Advanced Synthesis & Catalysis*, 2011, **353**, 2384-2398.
3. Y. H. Choi, J. H. Kim, J. H. Park, N. Lee, D. H. Kim, K. S. Jang, I. H. Park and B. G. Kim, *Glycobiology*, 2014, **24**, 159-169.
4. X. Liu, W. Qi, Y. F. Wang, D. W. Lin, X. J. Yang, R. X. Su and Z. M. He, *Acs Applied Materials & Interfaces*, 2018, **10**, 33407-33415.
5. R. Shomal, W. Du and S. Al-Zuhair, *Journal of Environmental Chemical Engineering*, 2022, **10**.
6. T. Taghizadeh, A. Ameri, A. Talebian-Kiakalaieh, S. Mojtavavi, A. Ameri, H. Forootanfar, S. Tarighi and M. A. Faramarzi, *International Journal of Biological Macromolecules*, 2021, **166**, 1301-1311.
7. M. Zhou, X. Ju, Z. Zhou, L. S. Yan, J. J. Chen, X. M. Yao, X. Q. Xu and L. Z. Li, *Acs Sustainable Chemistry & Engineering*, 2019, **7**, 19185-19193.
8. S. Farhadi, A. Riahi-Madvar, G. Sargazi and M. Mortazavi, *International Journal of Biological Macromolecules*, 2021, **173**, 366-378.
9. D. Tocco, C. Carucci, D. Todde, K. Shortall, F. Otero, E. Sanjust, E. Magner and A. Salis, *Colloids and Surfaces B-Biointerfaces*, 2021, **208**.
10. S. L. Cao, D. M. Yue, X. H. Li, T. J. Smith, N. Li, M. H. Zong, H. Wu, Y. Z. Ma and W. Y. Lou, *Acs Sustainable Chemistry & Engineering*, 2016, **4**, 3586-3595.
11. Y. F. Gui, Y. Wu, T. Shu, Z. Q. Hou, Y. F. Hu, W. Li and L. J. Yu, *International Journal of Biological Macromolecules*, 2024, **260**.
